# Supplementary material
Source: Atypon-hosted journal article supplement (doi:10.1287/opre.2024.1085)

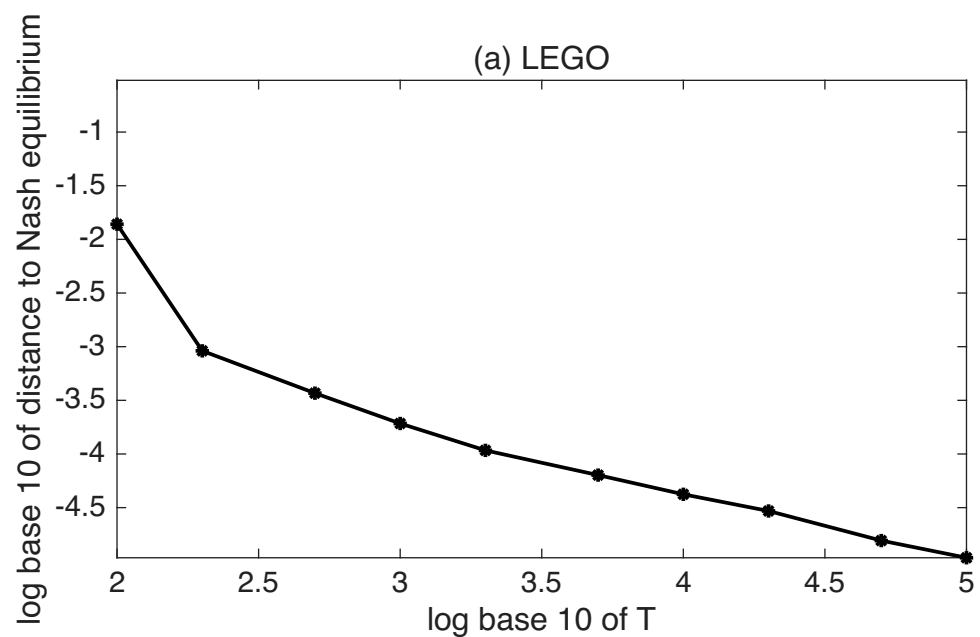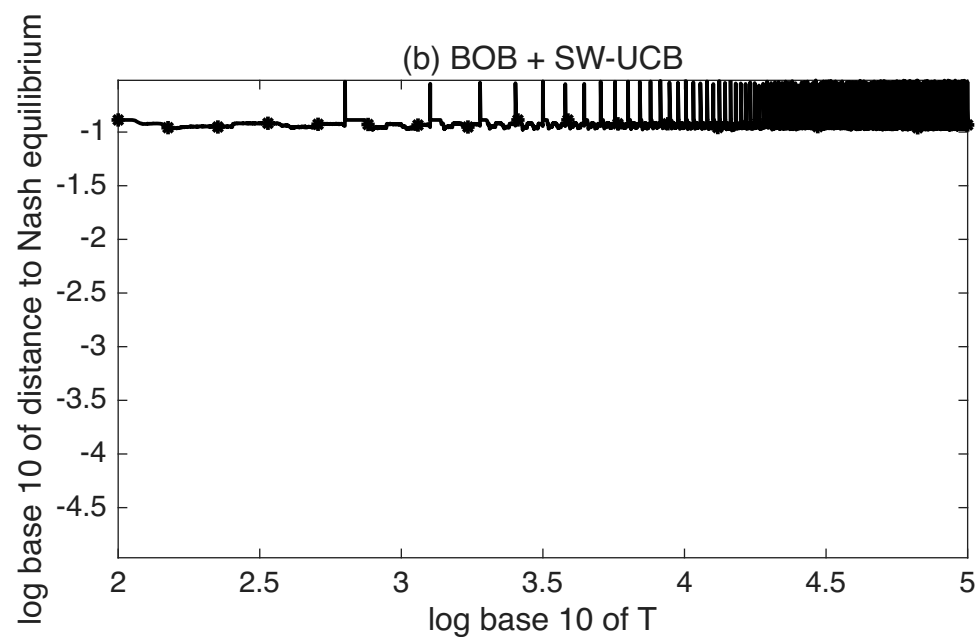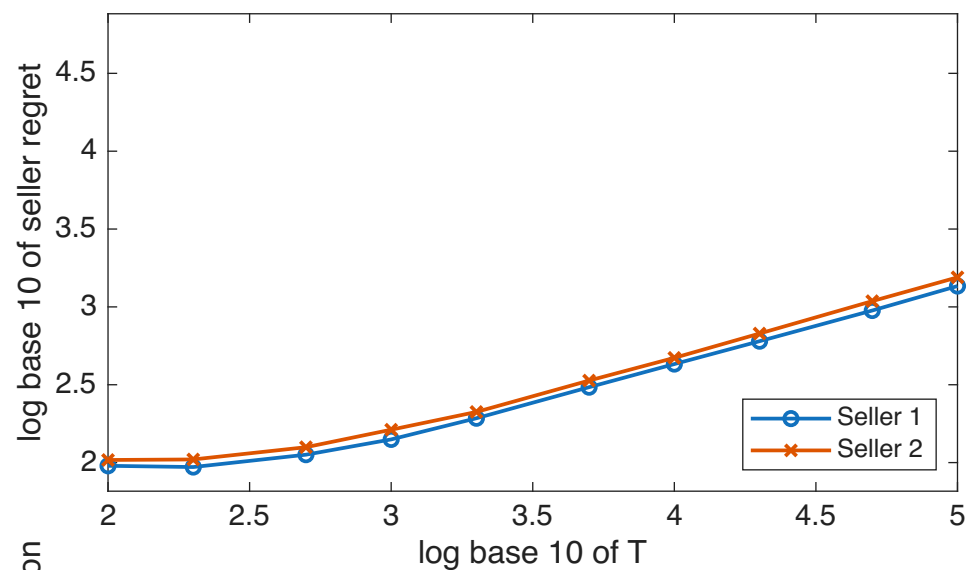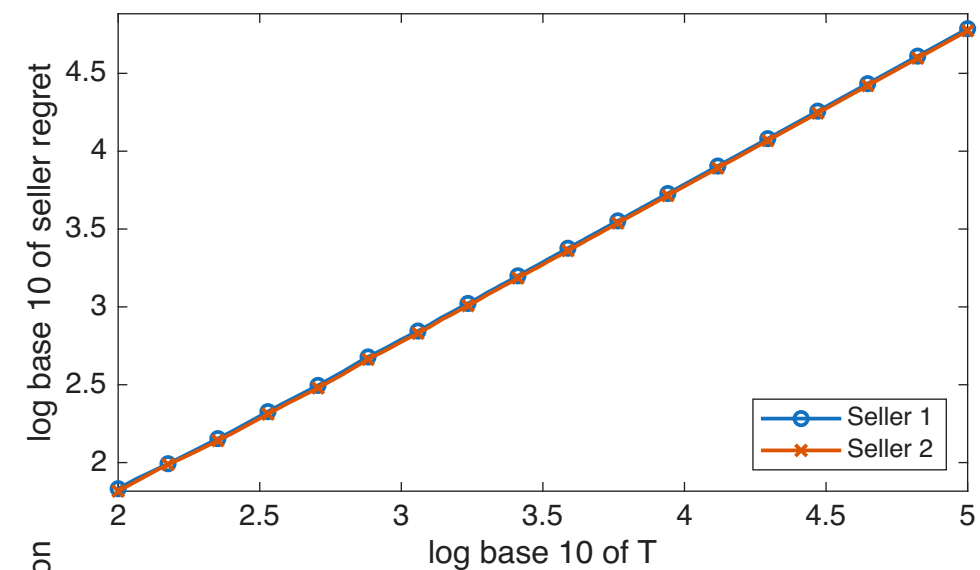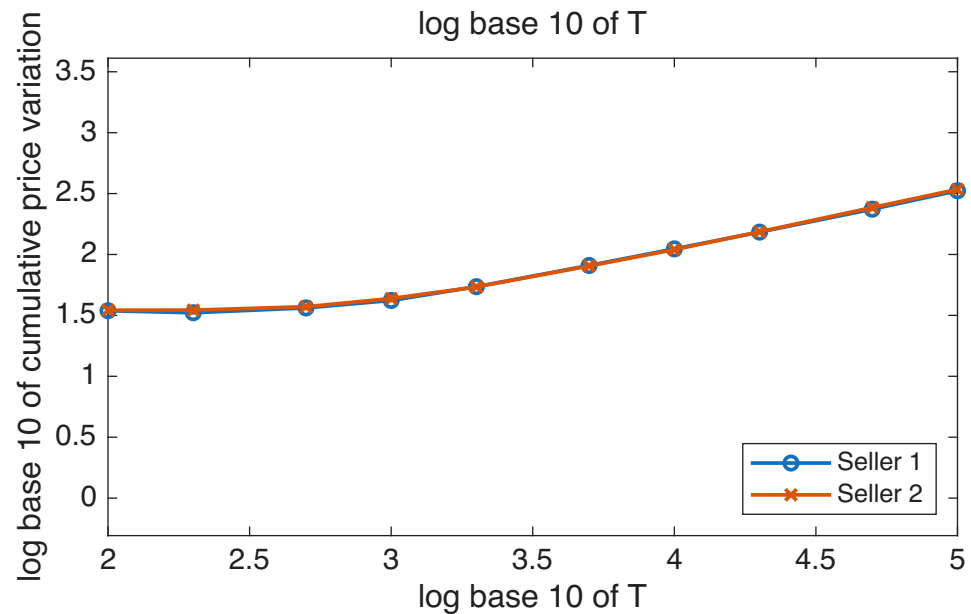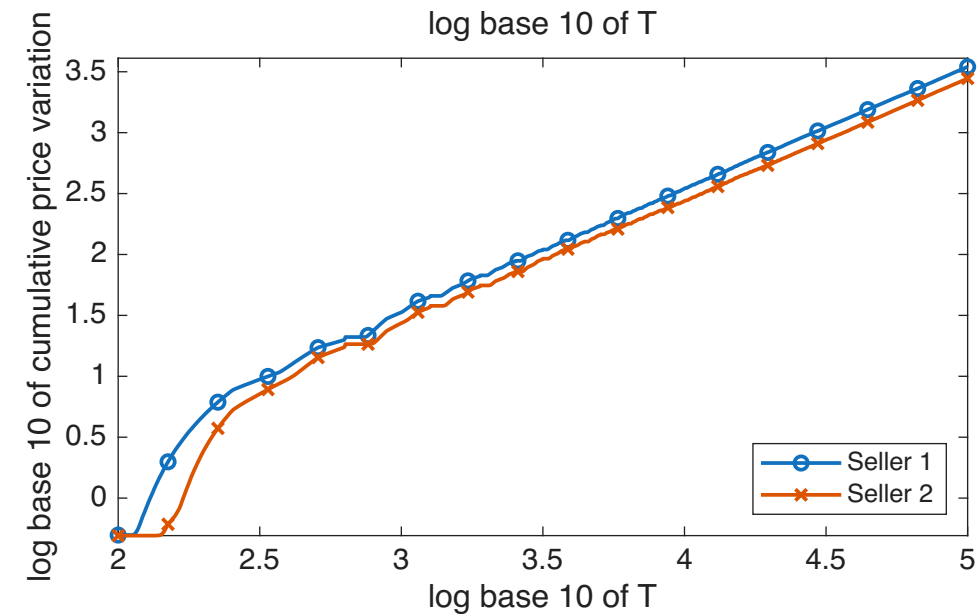

Supplement: opre.2024.1085.cd.zip [file vsnonstat.pdf › OR/vs-nonstat/vsnonstat.pdf]
